# Supplementary material for: Differential Protein Expression Profiles of Cyst Fluid from Papillary Thyroid Carcinoma and Benign Thyroid Lesions
Source: PLoS One. 2015 May 15;10(5):e0126472. doi: 10.1371/journal.pone.0126472 (PMC4433121; doi:10.1371/journal.pone.0126472)
Supplement: S3 Table — (XLSX) [file pone.0126472.s005.xlsx]

## Sheet: Sheet1
Supplementary Table S3. Details of iTRAQ labeling and fluid properties of depleted
fluid samples used in LC MS/MS.
Case	Experiment	iTRAQ	Protein	Properties /appearance
number	number	labelling	(mg / ml)	of cyst fluid
cPTC-1	exp 1	116	7	liquid, red
cPTC-2	exp 1	117	2.5	liquid, dark
cPTC-3	exp 2	117	4.7	liquid, dark
cPTC-4	exp 1	118	7.1	liquid, red
cPTC-5*	exp 2	118	31.4	liquid, yellow
cPTC-6	exp 1	119	38.2	liquid, dark
cPTC-7	exp 2	119	7.4	liquid, yellow
Benign-1	exp 1	114	7.1	liquid, red
Benign-2	exp 2	114	6.7	liquid, brown
Benign-3	exp 1	115	5.5	liquid, dark
Benign-4	exp 2	115	9.8	liquid, dark
Benign-5	exp 1	113	5.1	liquid, dark
Benign-6	exp 2	113	4.3	liquid, brown
Benign-7	exp 2	116	7.2	liquid, dark
*cPTC-5 was excluded from the analysis due to possible contamination by fluid from goiter.
